# Supplementary material for: Taming interfacial electronic properties of platinum nanoparticles on vacancy-abundant boron nitride nanosheets for enhanced catalysis
Source: PubMed Central journal article supplement (PMC5472761; doi:10.1038/ncomms15291), 2017-06-09
Supplement: ncomms15291-s1.pdf [file ncomms15291-s1.pdf]

**Supplementary Table 1** | Comparison between the performance of Pt/h-BNNs and literature reported catalysts.

| Catalysts                         | Pt loadings           | SV(Lg <sup>-1</sup> Pt h <sup>-1</sup> ) | T <sub>0</sub> | T <sub>100</sub> | Note      |
|-----------------------------------|-----------------------|------------------------------------------|----------------|------------------|-----------|
| Pt/SiO <sub>2</sub>               | 1 wt. %               | 874                                      | 150°C          | 200°C            | [1]       |
| Pt/CNT                            | 1 wt. %               | 990                                      | -              | 180°C            | [2]       |
| Pt/Al <sub>2</sub> O <sub>3</sub> | 50 g ft <sup>-3</sup> | 3205                                     | 80°C           | 150°C            | [3]       |
| Pt/Al <sub>2</sub> O <sub>3</sub> | 1.03 wt. %            | -                                        | 100°C          | 180°C            | [4]       |
| Pt/h-BNNS                         | 1.18 wt. %            | 1667                                     | 35°C           | 67°C             | This work |

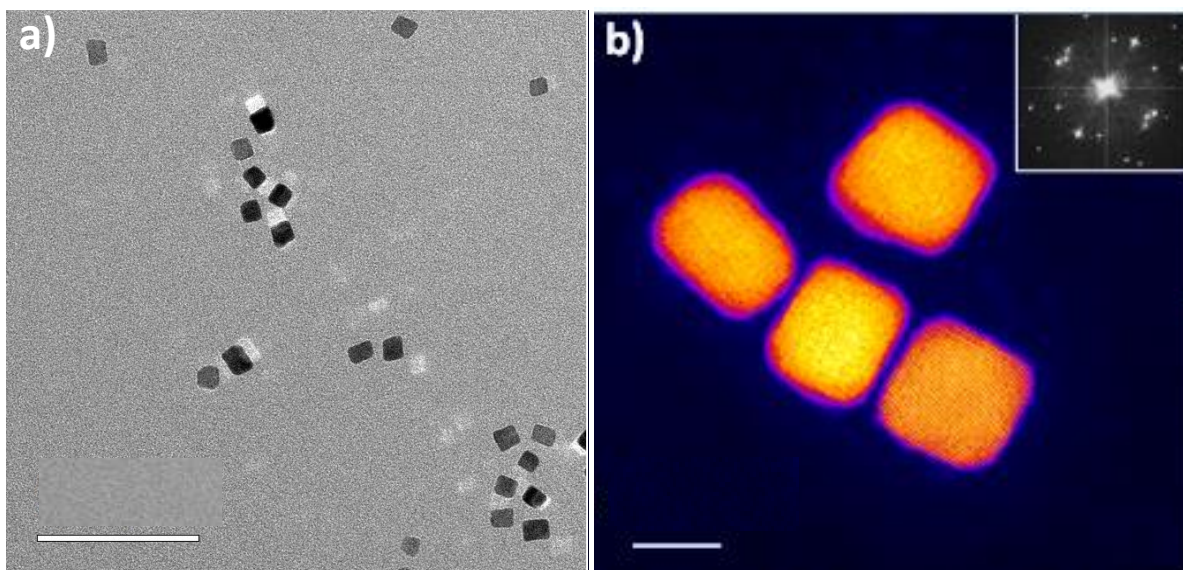

**Supplementary Figure 1** | TEM (a: Scale bar, 50 nm) and STEM (b: Scale bar, 5 nm.) of Pt NPs (inset is the electron diffraction pattern of Pt NPs).

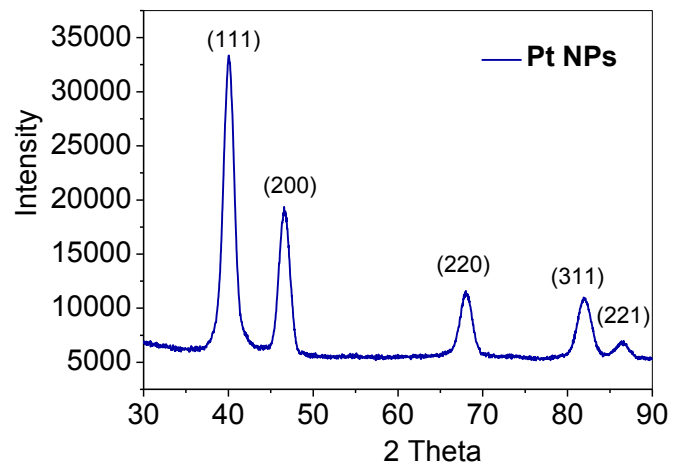

**Supplementary Figure 2** | XRD of Pt NPs.

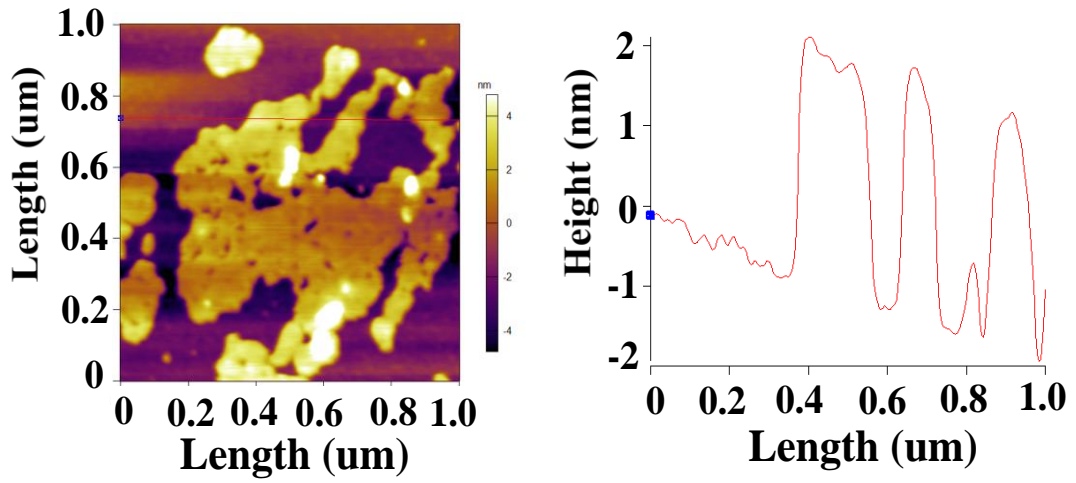

Supplementary Figure 3 | AFM image and the corresponding height profiles of *h*-BNNS

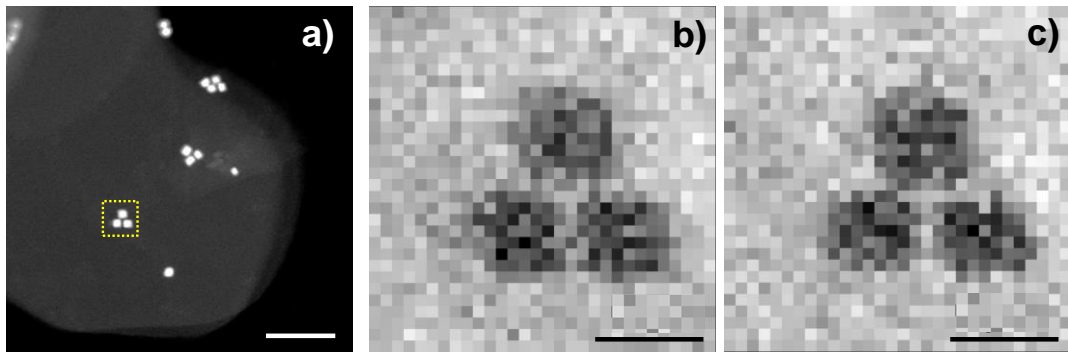

**Supplementary Figure 4** | **a)** ADF image showing the distribution of bright Pt NPs in Pt/*h*-BNNS. Scale bar, 50 nm. **b)** B-K, Scale bar, 10 nm. **c)** N-K EELS elemental mapping obtained from the local area marked by a dotted square in **(a)**, Scale bar, 10 nm.

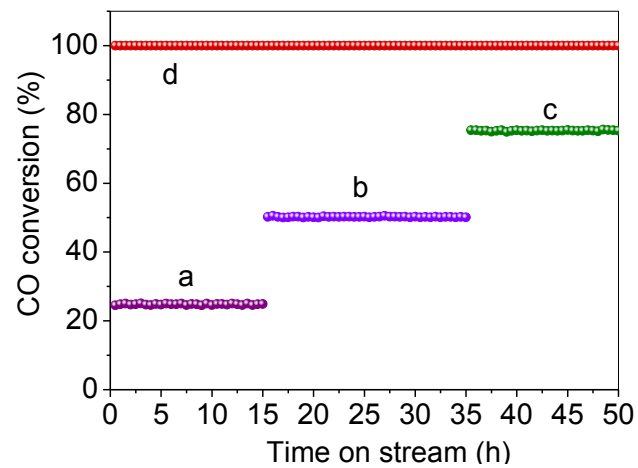

**Supplementary Figure 5** | CO conversion of Pt/h-BNNS at different temperatures a: 39°C

b:45 °C c:49 °C d:75 °C, m (catalyst) =30 mg Pt content= 1.18 wt.%

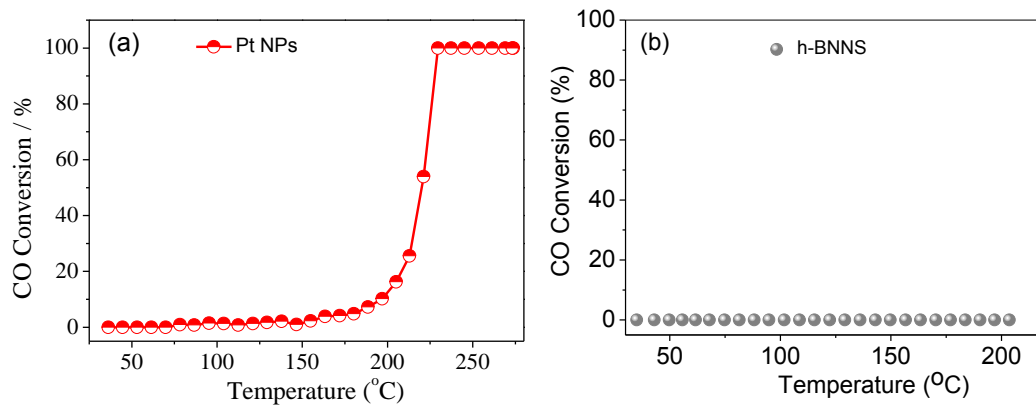

**Supplementary Figure 6** | CO oxidation activity of Pt NPs (a) and *h*-BNNS (b) alone. The mass of the catalyst equals with the amount of Pt NPs and *h*-BNNS in 30 mg Pt NPs/*h*-BNNS, respectively. CO flow rate 10 mL min<sup>-1</sup>;

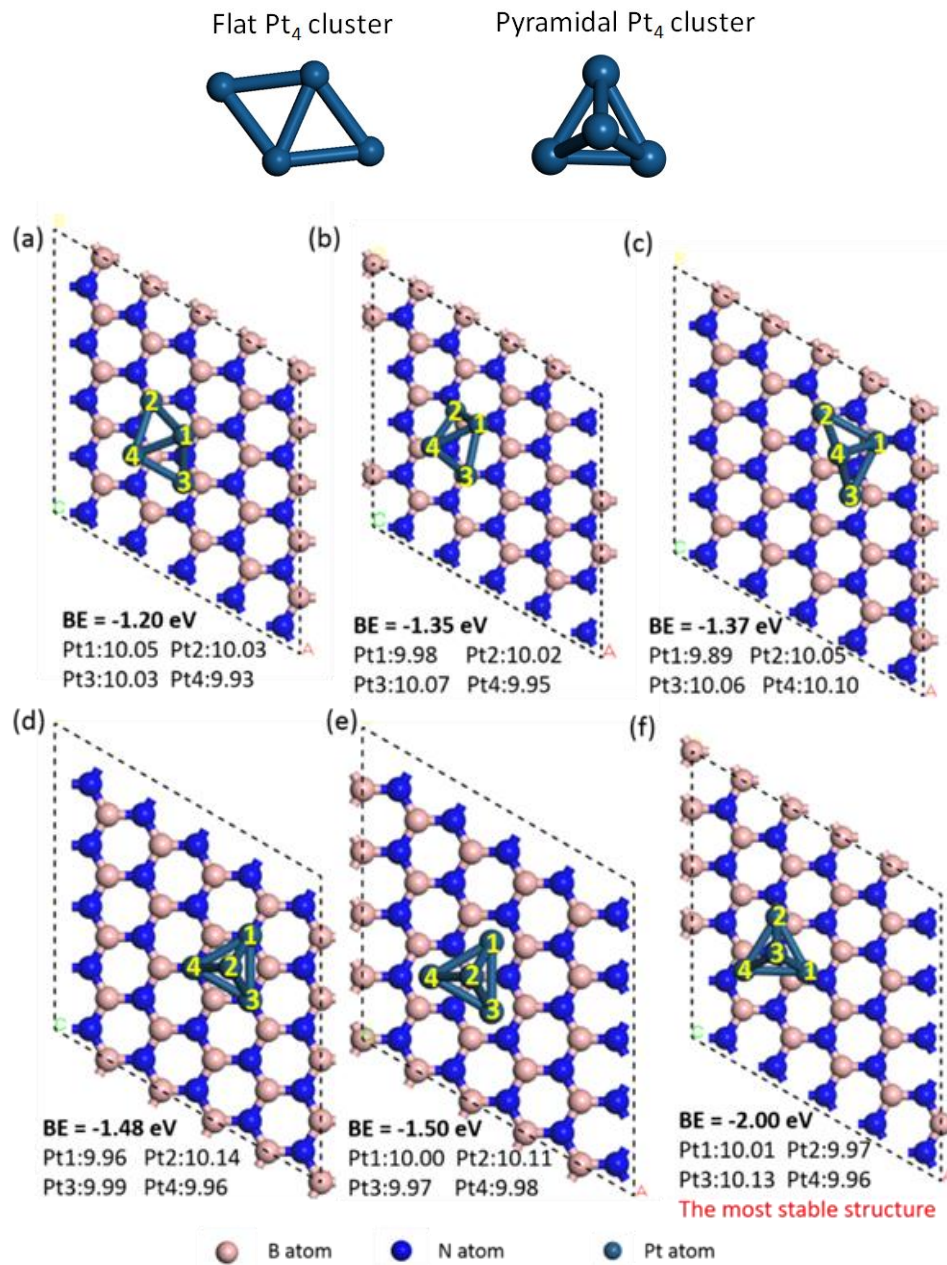

**Supplementary Figure 7** | Optimized structure and corresponding Bader charge of a Pt<sub>4</sub> cluster on clean *h*-BNNS considered in this study. **(a-c)** Flat Pt<sub>4</sub> cluster on *h*-BNNS. **(d-f)** Pyramidal Pt<sub>4</sub> cluster on *h*-BNNS.



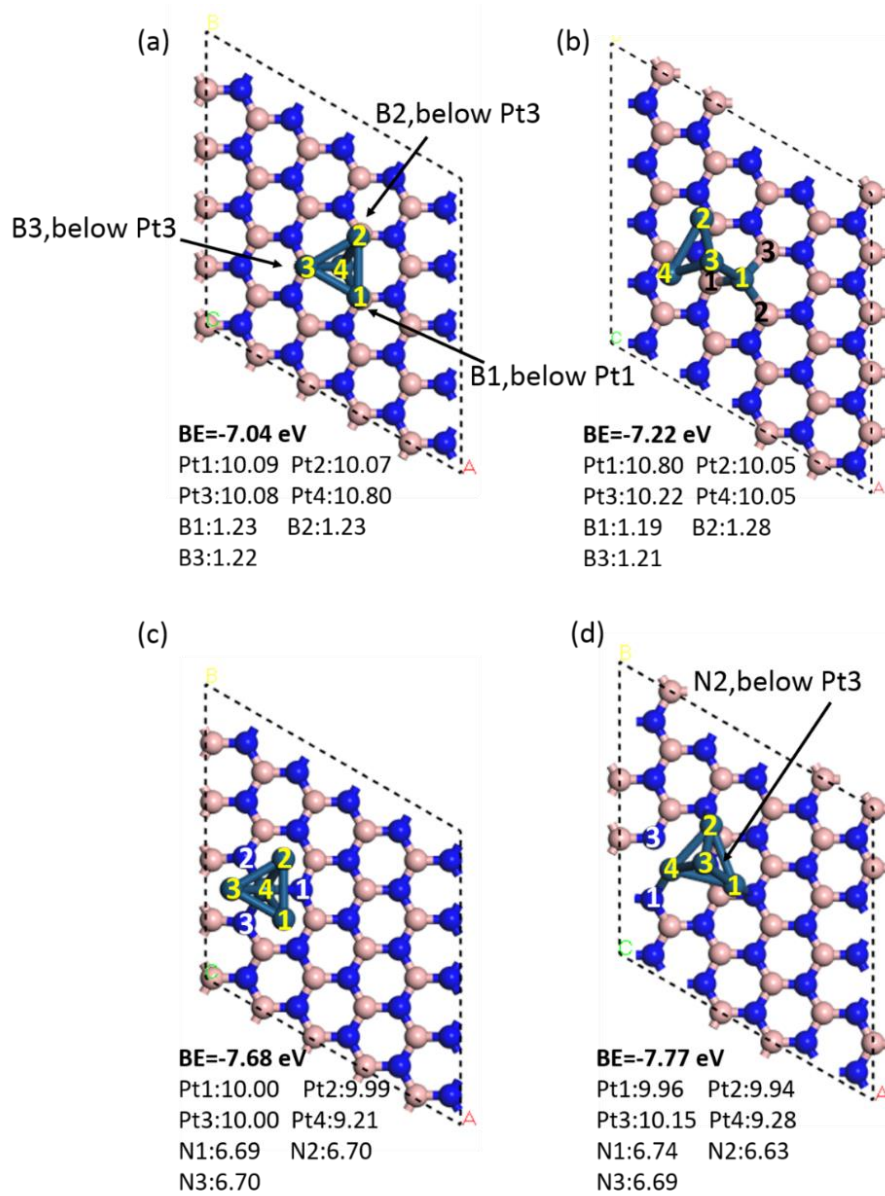

**Supplementary Figure 8** | Optimized structure and corresponding Bader charge of a Pt<sub>4</sub> cluster on (a) Nv (b) Nv (c) Bv (d) Bv *h*-BNNS considered in this study

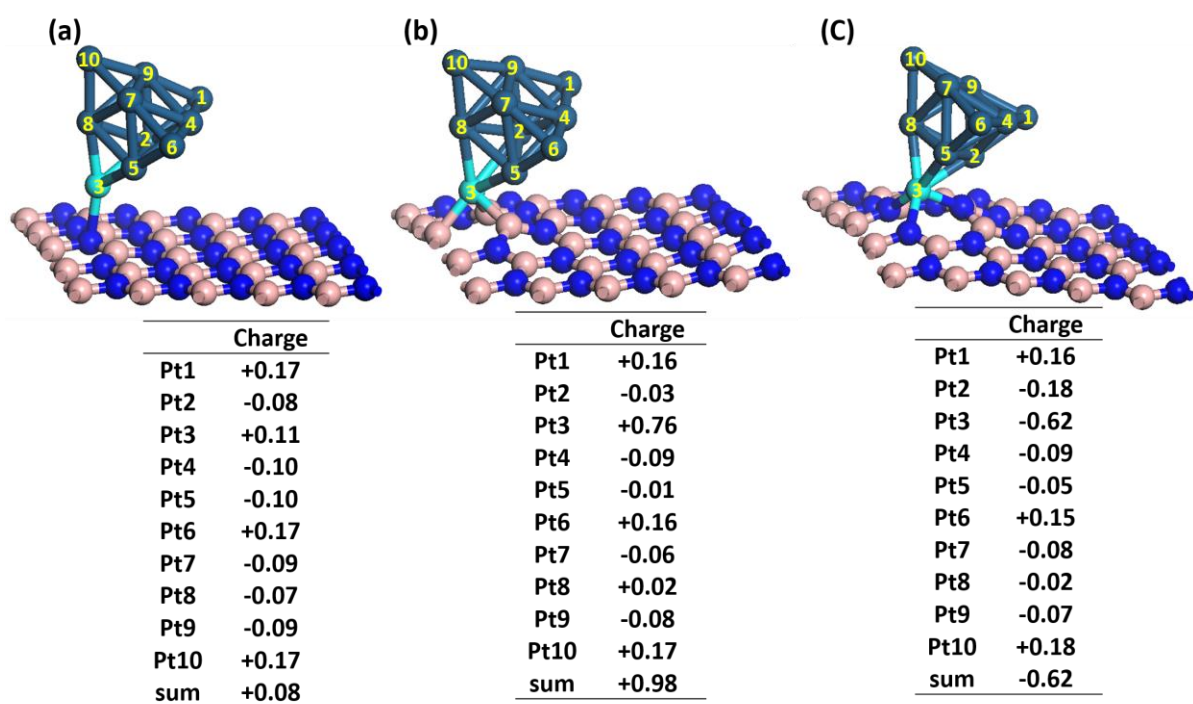

**Supplementary Figure 9** | Optimized structures and Bader charges of Pt<sub>10</sub> cluster on *h*-BNNS. (a) Pt<sub>10</sub> cluster on clean, vacancy-free *h*-BNNS, (b) Pt<sub>10</sub> cluster *h*-BNNS with N<sub>v</sub>, and (c) Pt<sub>10</sub> cluster on *h*-BNNS with B<sub>v</sub>. The sum here is the total valence electrons for Pt<sub>10</sub> cluster. The Pt atoms with the most charge transfer on *h*-BNNS with N<sub>v</sub> and B<sub>v</sub> are highlighted in blue. '+' sign represents charge accumulation; while '-' sign represents charge depletion.

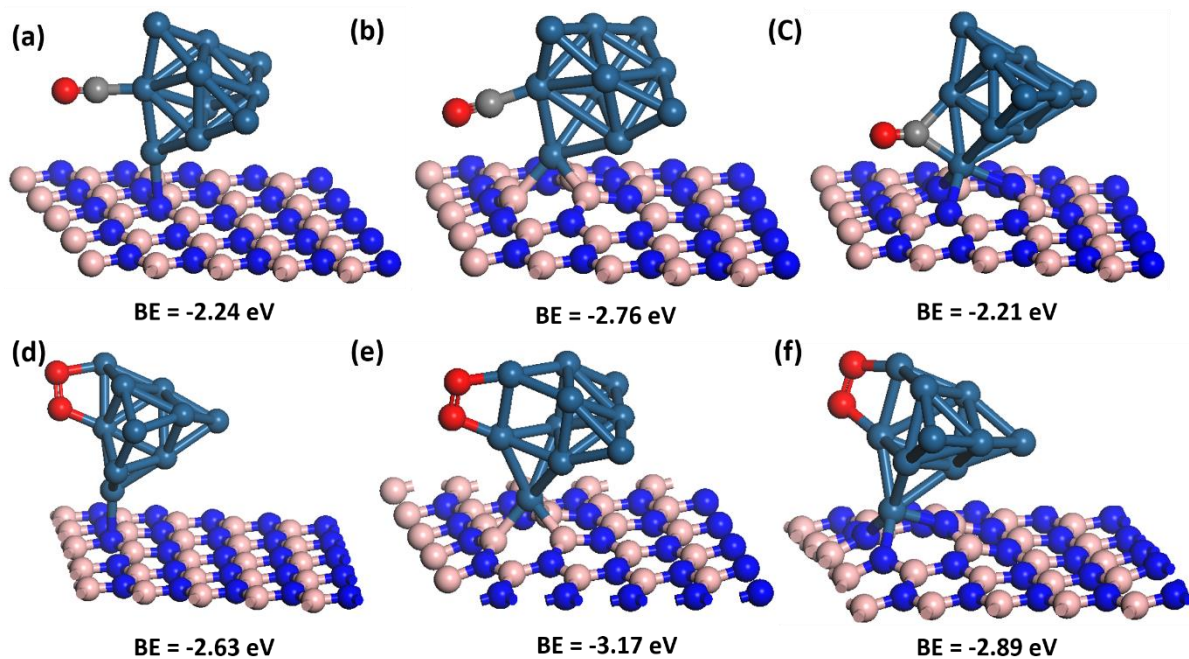

**Supplementary Figure 10** | The most stable configuration of CO (a-c) and O<sub>2</sub> (d-f) adsorption and BEs on Pt<sub>10</sub> cluster. (a) Pt<sub>10</sub> cluster on clean, vacancy-free *h*-BNNS, (b) Pt<sub>10</sub> cluster *h*-BNNS with N<sub>v</sub>, and (c) Pt<sub>10</sub> cluster on *h*-BNNS with B<sub>v</sub>, (d) Pt<sub>10</sub> cluster on clean, vacancy-free *h*-BNNS, (e) Pt<sub>10</sub> cluster *h*-BNNS with N<sub>v</sub>, and (f) Pt<sub>10</sub> cluster on *h*-BNNS with B<sub>v</sub>.

Low surface area ( $10 \text{ m}^2 \text{ g}^{-1}$ )

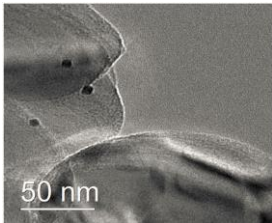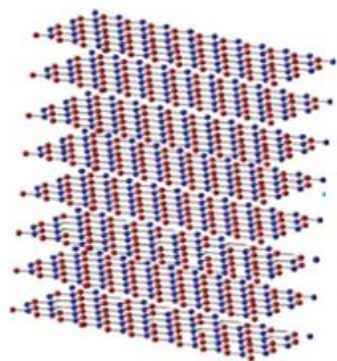

bulk h-BN

High surface area ( $278 \text{ m}^2 \text{ g}^{-1}$ )

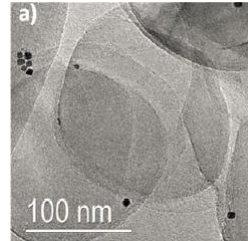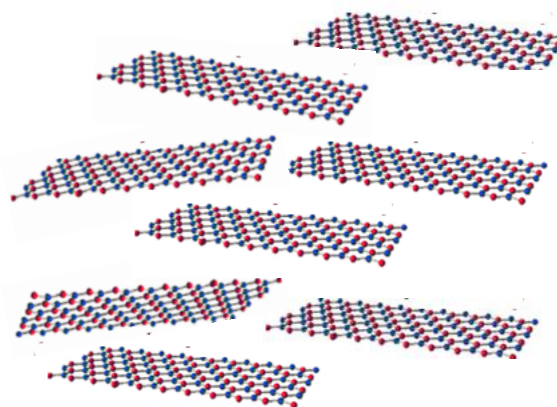

h-BNNS

exfoliation

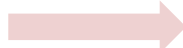

**Supplementary Figure 11** | Pt NPs supported on bulk BN and *h*-BNNS and the schematic illustration of the exfoliation of bulk BN to *h*-BNNS.

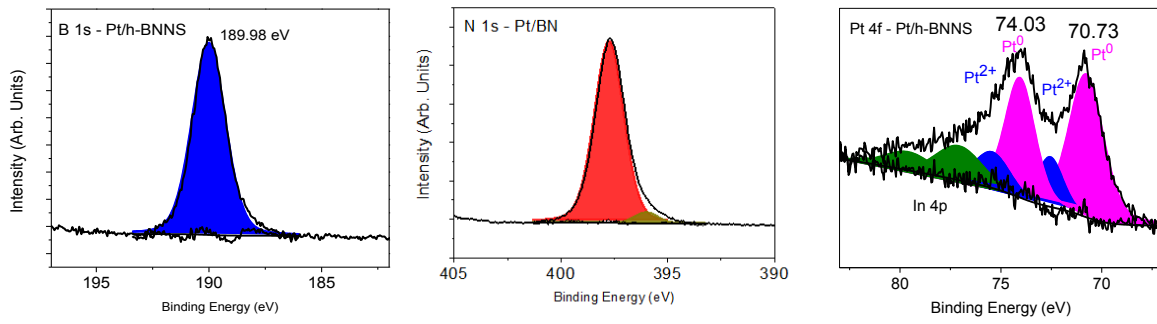

**Supplementary Figure 12 | XPS of Pt/h-BNNS**

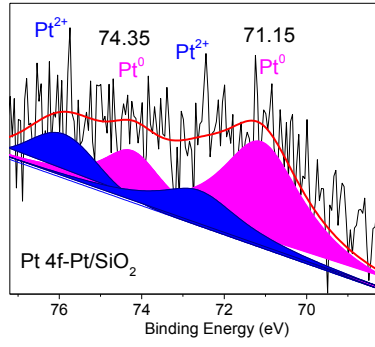

**Supplementary Figure 13 | XPS of Pt/SiO<sub>2</sub>**

## Supplementary Methods

**Preparation of Pt/bulk BN catalysts.** A certain volume of Pt NPs hexane solution was blow-dried by N<sub>2</sub>, weighing the mass of Pt NPs. A certain amount of bulk BN (mass ratio of Pt NPs and bulk BN is 1:11) was dispersed in the mixture of ethanol (5 mL) and hexane (5 mL) under sonication. Pt NPs were re-dispersed in the hexane (5 mL) under sonication and dropped slowly into the bulk BN solution, sonicating for 1 h. The as-prepared sample was separated via centrifugation, washed with ethanol three times and dried in vacuum at 50°C for further use. Pt content in Pt/bulk BN was 1.21 wt.% by ICP-OES.

**Preparation of Pt/TiO<sub>2</sub> catalysts.** A certain volume of Pt NPs hexane solution was blow-dried by N<sub>2</sub>, weighing the mass of Pt NPs. A certain amount of P25 (mass ratio of Pt NPs and P25 is 1:11) was dispersed in the mixture of ethanol (5 mL) and hexane (5 mL) under sonication. Pt NPs were re-dispersed in the hexane (5 mL) under sonication and dropped slowly into the P25 solution, sonicating for 1 h. The as-prepared sample was separated via centrifugation, washed with ethanol three times and dried in vacuum at 50°C for further use. Pt content in Pt/TiO<sub>2</sub> was 1.15 wt.% by ICP-OES.

**Preparation of Pt/SiO<sub>2</sub> catalysts.** A certain volume of Pt NPs hexane solution was blow-dried by N<sub>2</sub>, weighing the mass of Pt NPs. A certain amount of SiO<sub>2</sub> (mass ratio of Pt NPs and SiO<sub>2</sub> is 1:12) was dispersed in the mixture of ethanol (5 mL) and hexane (5 mL) under sonication. Pt NPs were re-dispersed in the hexane (5 mL) under sonication and dropped slowly into the SiO<sub>2</sub> solution, sonicating for 1 h. The as-prepared sample was separated via centrifugation, washed with ethanol three times and dried in vacuum at 50°C for further use. Pt content in Pt/SiO<sub>2</sub> was 1.16 wt.% by ICP-OES.

**Preparation of Pt/C catalysts.** A certain volume of Pt NPs hexane solution was blow-dried by N<sub>2</sub>, weighing the mass of Pt NPs. A certain amount of acetylene black (mass ratio of Pt NPs and acetylene black is 1:12) was dispersed in the mixture of ethanol (5 mL) and hexane (5 mL) under sonication. Pt NPs were re-dispersed in the hexane (5 mL) under sonication and dropped slowly into the acetylene black solution, sonicating for 1 h. The as-prepared sample was separated via centrifugation, washed with ethanol three times and dried in vacuum at 50°C for further use. Pt content in Pt/C was 1.18 wt.% by ICP-OES.

## Supplementary REFERENCES

- [1] Jung, C. *et al.* Catalytic activity of Pt/SiO<sub>2</sub> nanocatalysts synthesized via ultrasonic spray pyrolysis process under CO oxidation, *Appl. Catal. B-Environ.*, **154–155**, 171–176 (2014).
- [2] Jardim, E. O., Gonçalves, M., Rico-Francés, S., Sepúlveda-Escribano, A., & Silvestre-Albero, J. Superior performance of multi-wall carbon nanotubes as support of Pt-based catalysts for the preferential CO oxidation: Effect of ceria addition, *Appl. Catal. B- Environ.*, **113–114**, 72–78 (2012).
- [3] Hazlett, M. J., & Epling, W. S. Spatially resolving CO and C<sub>3</sub>H<sub>6</sub> oxidation reactions in a Pt/Al<sub>2</sub>O<sub>3</sub> model oxidation catalyst, *Catal. Today*, **267**, 157–166 (2016).

[4] Ivanova, A.S. *et al.* Metal–support interactions in Pt/Al<sub>2</sub>O<sub>3</sub> and Pd/Al<sub>2</sub>O<sub>3</sub> catalysts for CO oxidation, *Appl. Catal. B-Environ.*, **97**, 57–71 (2010).
